# Supplementary material for: Structure of a metal-independent bacterial glycosyltransferase that catalyzes the synthesis of histo-blood group A antigen
Source: PubMed Central journal article supplement — Sci Rep. 2012 Dec 7;2:940. doi: 10.1038/srep00940 (PMC3516806; doi:10.1038/srep00940), 2012-12-07
Supplement: srep00940-s1.pdf [file srep00940-s1.pdf]

## **Supplementary Information**

### **Molecular structure of a metal-independent bacterial glycosyltransferase that catalyzes the synthesis of histo-blood group A antigen**

**Nethaji Thiyagarajan<sup>1</sup>, Tram T.K. Pham<sup>1</sup>, Brittany Stinson<sup>2</sup>, Amit Sundriyal<sup>1,3</sup>, Percy Tumbale<sup>2,4</sup>, Michelle Lizotte-Waniewski<sup>2</sup>, Keith Brew<sup>2</sup> and K. Ravi Acharya<sup>1</sup>**

<sup>1</sup>Department of Biology and Biochemistry, University of Bath, Claverton Down, Bath BA2 7AY, UK

<sup>2</sup>Department of Biomedical Science, Charles E. Schmidt College of Medicine, Florida Atlantic University, 777 Glades Road, Boca Raton, FL 33431, USA

Present addresses:

<sup>3</sup>Department of Structural Biology, Biozentrum, University of Basel, Klingelbergstrasse 70, CH-4056 Basel, Switzerland

<sup>4</sup>National Institute of Environmental Health Sciences, 111 TW Alexander Dr., Research Triangle Park, NC 27709, USA

Correspondence and request for materials should be addressed to K.B. (email: kbrew@fau.edu) or to K.R.A. (email: bsskra@bath.ac.uk)

## Supplementary Figures

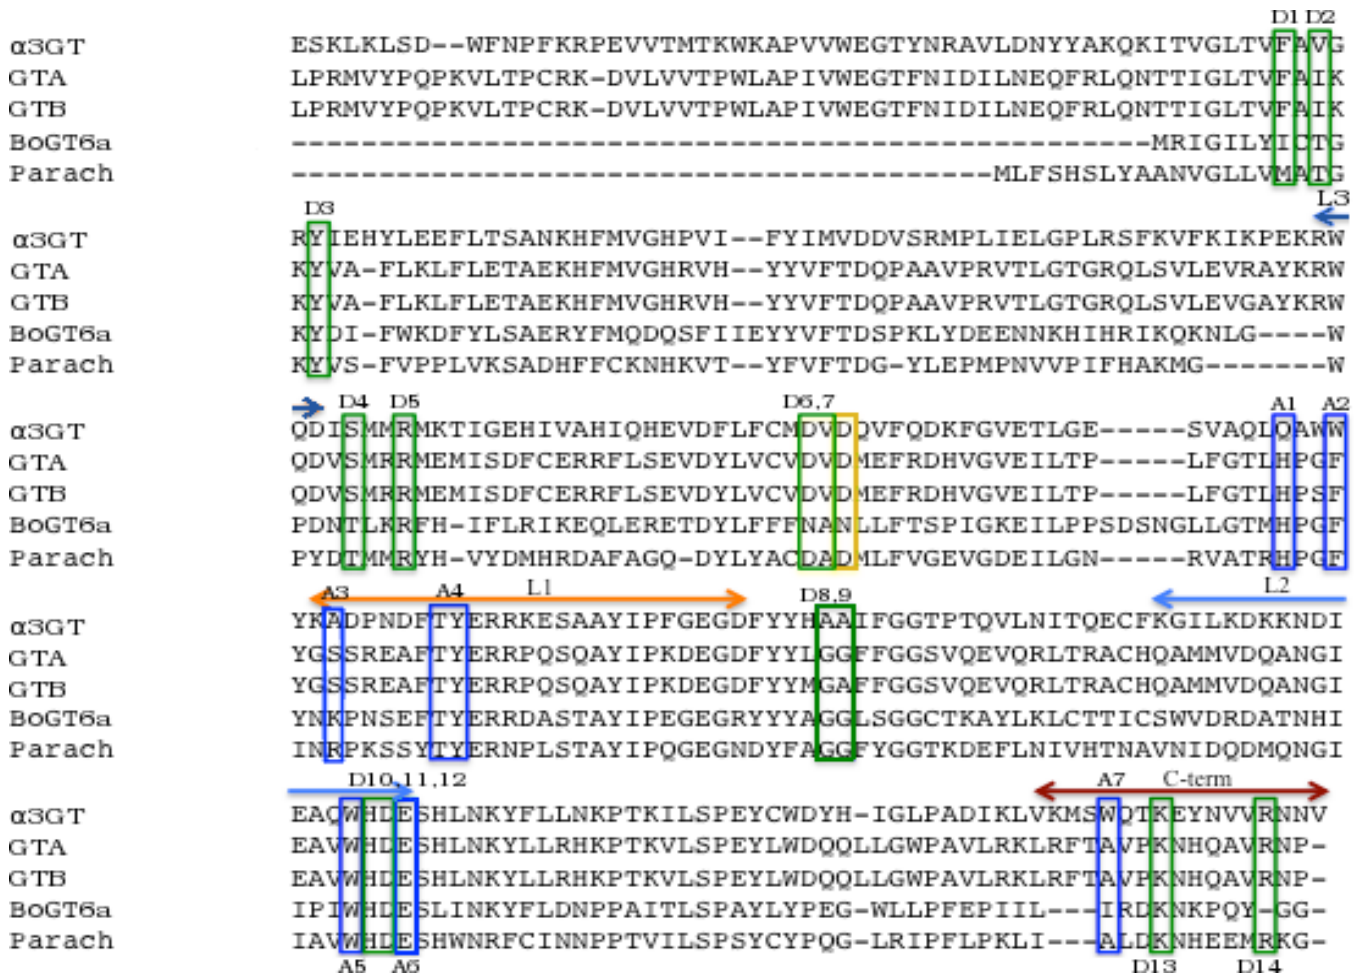

**Figure S1.** A multiple sequence alignment (using Clustal X2) of GT6 family members used in this study. Loop1, Loop2, Loop3 and C-term are secondary structural regions of BoGT6a that exhibit significant conformational changes upon ligand binding. A1-A7 are residues that contribute towards acceptor binding and are boxed in blue colour. D1-D14 are donor binding residues and are boxed in green colour. The residues in the box coloured in gold are the manganese ion binding D-X-D motif of GTA/B and/or α3GT. In BoGT6a this is replaced by N-X-N motif.

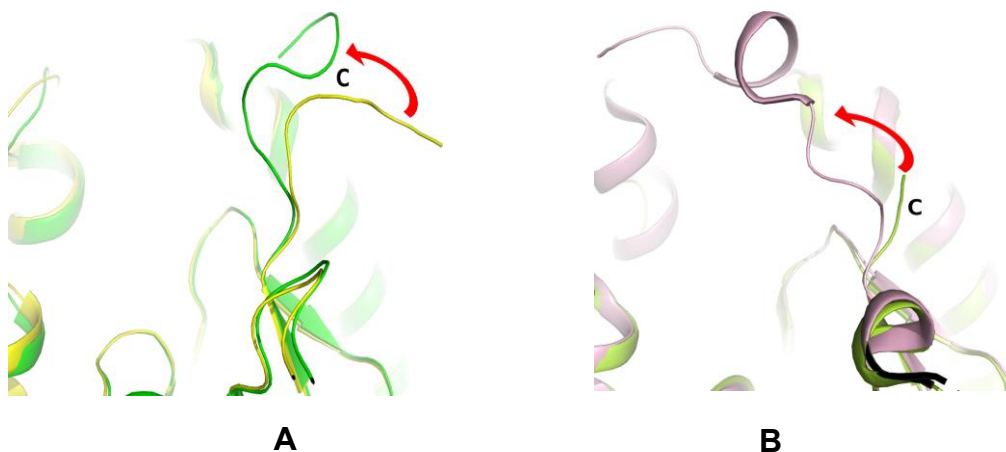

**Figure S2.** C-terminal conformational flexibility as observed in X-ray crystallographic structures of BoGT6a and  $\alpha$ 3GT. **(A)** BoGT6a (yellow) and BoGT6a-FAL (green); **(B)**  $\alpha$ 3GT (pea colour) and  $\alpha$ 3GT in complex with UDP and GalNAc (PDB id: 1GX4) (light purple).

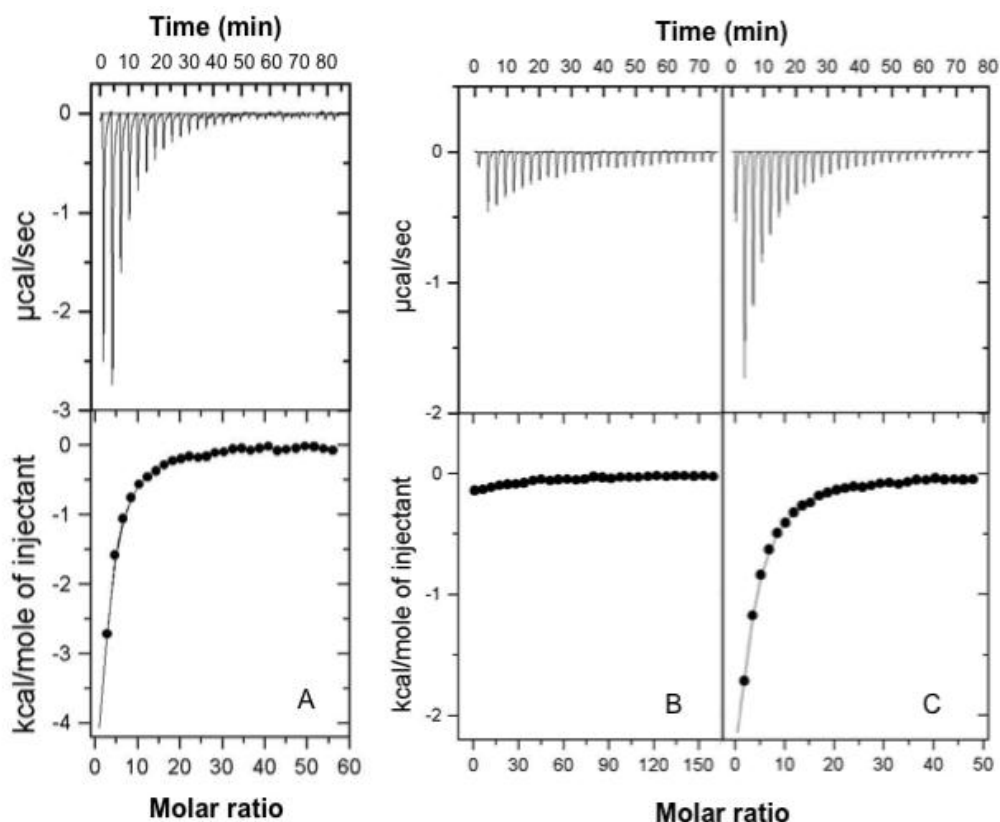

**Figure S3.** Isothermal titration of BoGT6a with ligands. Titrations were with **(A)** UDP-GalNAc **(B)** FAL and **(C)** FAL in the presence of 3 mM UDP **(D)**. Both the ligand and sample were in 20mM HEPES buffer pH 7.5, containing 1 mM DTT and 0.2M NaCl and the reaction cell was maintained at 25 °C. The first injection in each titration was 5  $\mu$ l of ligand and subsequent injections were 10

$\mu$ l. The upper section of each panel shows the exotherms of binding for each injection of ligand and the lower, the integrated binding isotherm with the experimental points (filled circles) and fitted line that gave the values for thermodynamic parameters give in **Table 3**.
